# Supplementary material
Source: MDPI journal article supplement (https://www.mdpi.com/2073-4433/10/1/1)
Supplement: s1 [file s1]

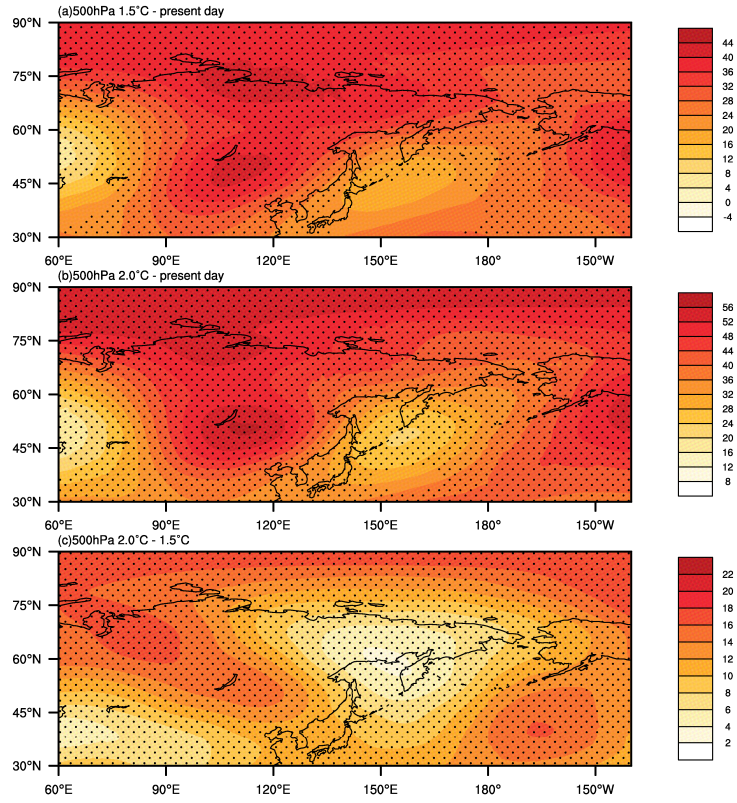

**Figure S1.** Regional mean changes in 500 hPa geopotential height in (a) 1.5 °C warming relative to the present day, (b) 2.0 °C warming relative to the present day, and (c) 2.0 °C warming relative to 1.5 °C warming. The dotted areas are statistically significant at the 5% level according to the Student's *t*-test.

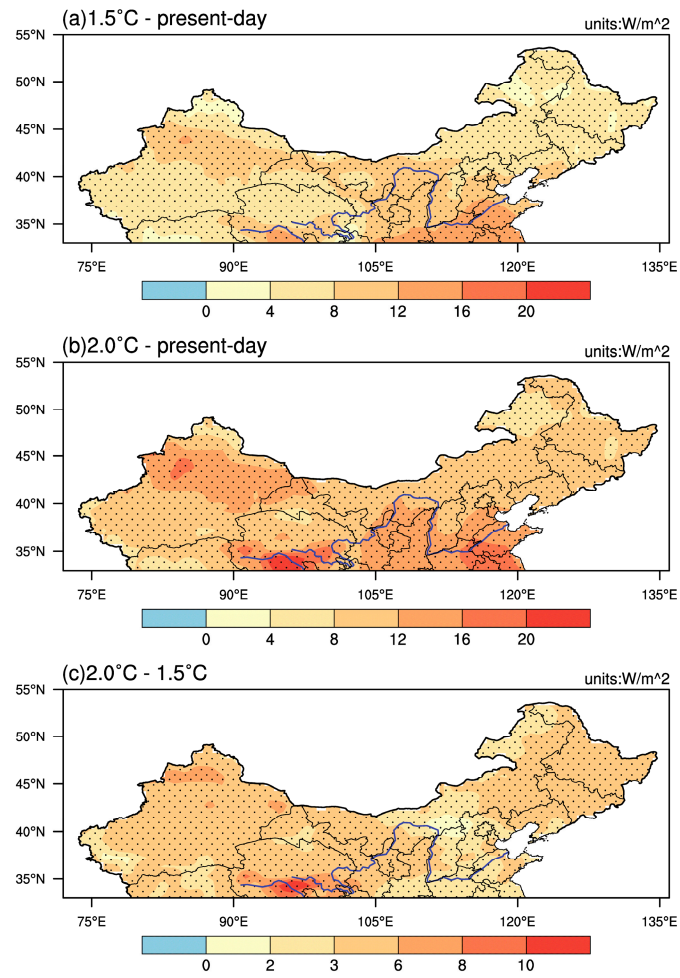

**Figure S2.** Regional mean changes in surface net radiation flux in (a) 1.5 °C warming relative to the present day, (b) 2.0 °C warming relative to the present day, and (c) 2.0 °C warming relative to 1.5 °C warming. The dotted areas are statistically significant at the 5% level according to the Student's *t*-test.
